# Supplementary material
Source: ML conference proceedings conference paper supplement (https://openreview.net/forum?id=cbFfF4g9fIy)
Supplement: supplementary_material [file attachment]

# Author Statement

We, the authors of NAS-Bench-360, confirm that we will bear all responsibilities in the situation of violation of rights caused by our work and its included datasets. The dataset that we have introduced, Spherical CIFAR-100, is under the CC BY-SA license.

Signature: Renbo Tu

Date: 06/03/2021
