# Supplementary material
Source: ML conference proceedings conference paper supplement (https://openreview.net/forum?id=cbFfF4g9fIy)
Supplement: supplementary_material [file attachment]

---

# NAS-Bench-360: Benchmarking Diverse Tasks for Neural Architecture Search

---

**Renbo Tu**  
Carnegie Mellon University  
renbo@cmu.edu

**Mikhail Khodak**  
Carnegie Mellon University  
khodak@cmu.edu

**Nicholas Roberts**  
Carnegie Mellon University  
ncrobert@andrew.cmu.edu

**Maria-Florina Balcan**  
Carnegie Mellon University  
ninamf@cs.cmu.edu

**Ameet Talwalkar**  
Carnegie Mellon University and Determined AI  
talwalkar@cmu.edu

## Abstract

1 Most existing neural architecture search (NAS) benchmarks and algorithms priori-  
2 tize performance on well-studied tasks, focusing on computer vision datasets such  
3 as CIFAR and ImageNet. However, the applicability of NAS approaches in other  
4 areas is not adequately understood. In this paper, we present **NAS-Bench-360**,  
5 a benchmark suite for evaluating state-of-the-art NAS methods on less-explored  
6 datasets. To do this, we organize a diverse array of tasks, from classification of  
7 simple deformations of natural images to predicting protein folding and partial  
8 differential equation solving. Our evaluation pipeline compares architecture search  
9 spaces of different flavors, and reveals varying performance on different tasks,  
10 providing baselines for further use. All data and reproducible evaluation code are  
11 open-source and publicly available. The results of our evaluation show that current  
12 state-of-the-art NAS methods often struggle to compete with simple baselines and  
13 human-designed architectures on the majority of tasks in our benchmark. At the  
14 same time, they can be quite effective on a few individual, understudied tasks. This  
15 demonstrates the importance of evaluation on diverse tasks to better understand the  
16 usefulness of different approaches to architecture search and automation.

## 17 1 Introduction

18 Neural architecture search (NAS) aims to automate the design of deep neural networks, ensuring  
19 performance on par with hand-crafted architectures while reducing human labor devoted to tedious  
20 architecture tuning [8]. With the growing number of application areas of ML, and thus of use-cases  
21 for automating it, NAS has experienced an intense amount of study, with significant progress in  
22 search space design [3, 20, 32], search efficiency [22], and search algorithms [16, 27, 28]. While the  
23 use of NAS techniques may be especially impactful in under-explored or under-resourced domains  
24 where less expert help is available, the field has largely been dominated by methods designed for  
25 and evaluated on benchmarks in computer vision [6, 20, 29]. There have been a few recent efforts  
26 to diversify these benchmarks to settings such as vision-based transfer learning [7] and speech and  
27 language processing [13, 21]; however, evaluating NAS methods on such well-studied tasks using  
28 traditional, domain-specific search spaces does not give a good indication of their utility on more  
29 far-afield applications, which have often necessitated the design of custom neural operations [4, 19].  
30 We aim to rectify this issue by introducing a suite of diverse benchmark tasks drawn from various  
31 data domains that we collectively call **NAS-Bench-360**. This benchmark consists of an organized  
32 setup of five suitable datasets that can both (a) be evaluated in a unified way using existing NAS

33 methods and (b) come from a variety of different application areas, including numerical analysis,  
 34 organic chemistry, and medical imaging. We also include standard image classification evaluations as  
 35 a point of comparison, as many new methods continue to be designed for such tasks.

36 Following our construction of this benchmark, we evaluate three different search spaces using  
 37 strong methods for searching each of them and compare the results to expert-driven domain-specific  
 38 architecture design. The first search space is a simple baseline built around Wide ResNet (WRN) [30],  
 39 while the other two are well-studied modern NAS search spaces: DARTS [20] and DenseNAS [9].  
 40 We find that the NAS-based spaces struggle to beat even the simple WRN comparator on the majority  
 41 of tasks in the benchmark. On two of the tasks—classifying electromyography signals and solving  
 42 partial differential equations—NAS methods do significantly worse. NAS lags even further behind  
 43 when we include domain-specific expert-designed architectures, where it lags far behind on even  
 44 CIFAR-100 when disallowing extra augmentation or pre-training on ImageNet [25]. On the other  
 45 hand, DARTS cells perform relatively well on two tasks that *a priori* seem more challenging: spherical  
 46 image classification and protein-distance prediction. These observations and other empirical insights  
 47 demonstrate the necessity of a benchmark that provides a diverse array of data domains for evaluating  
 48 NAS methods.

49 To ensure the availability and impact of this benchmark, the associated datasets and eval-  
 50 uation pipelines will remain open-source and accessible at [https://rtu715.github.io/](https://rtu715.github.io/NAS-Bench-360/)  
 51 NAS-Bench-360/. Reproducibility is assured from open-sourcing all relevant code for the end-to-  
 52 end procedure, including data processing, architecture search, model retraining, and hyper-parameter  
 53 tuning frameworks.

## 54 2 Related Work

55 Benchmarks have been very important to the development of NAS in recent years. This includes  
 56 standard evaluation datasets and protocols, of which the most popular are the CIFAR-10 and ImageNet  
 57 routines used by DARTS [20]. Another important type of benchmark has been tabular benchmarks  
 58 such as NAS-Bench-101 [29], NAS-Bench-201 [6], and NAS-Bench-1Shot1 [31]; these benchmarks  
 59 exhaustively evaluate all architectures in their search spaces, which is made computationally feasible  
 60 by defining simple searched cells. Consequently, these benchmark cells are less expressive than the  
 61 DARTS cell [20], often regarded as the most powerful search space in the cell-based regime. Notably,  
 62 our benchmark is *not* a tabular benchmark, i.e. we do *not* evaluate every architecture from a fixed  
 63 search space; rather, the focus is on the organization of a suite of tasks to evaluate both NAS methods  
 64 and search spaces, which would necessarily be restricted if we first fixed a search space to construct a  
 65 tabular benchmark from.

66 While NAS methods and benchmarks have generally been focused on computer vision, recent work  
 67 such as AutoML-Zero [23] and XD operations [24] has started moving towards a more generically  
 68 applicable set of tools for AutoML. However, even more recent benchmarks that do go beyond the  
 69 most popular vision datasets have continued to focus on well-studied tasks, including vision-based  
 70 transfer learning [7], speech recognition [21], and natural language processing [13]. Our aim is to  
 71 go beyond such areas in order to evaluate the potential of NAS to automate the application of ML  
 72 in truly under-explored domains. One analogous work to ours in the field of meta-learning is the  
 73 Meta-Dataset benchmark of few-shot tasks [26], which similarly aimed to establish a wide-ranging  
 74 set of evaluations for that field.

## 75 3 NAS-Bench-360: A Suite of Diverse and Practical Tasks

76 In this section, we introduce the NAS setting being targeted by our benchmark, our motivation for  
 77 organizing a new set of diverse tasks as a NAS evaluation suite, and our task-selection methodology.  
 78 We report evaluations of specific algorithms on this new benchmark in the next section.

### 79 3.1 Neural Architecture Search: Problem Formulation and Baselines

80 For completeness and clarity, we first formally discuss the architecture search problem itself, starting  
 81 with the extended hypothesis class formulation [16]. Here the goal is to use a dataset of points  $x \in \mathcal{X}$   
 82 to find parameters  $\mathbf{w} \in \mathcal{W}$  and  $a \in \mathcal{A}$  of a parameterized function  $f_{\mathbf{w},a} : \mathcal{X} \mapsto \mathbb{R}_{\geq 0}$  that minimize

the expectation  $\mathbb{E}_{x \sim \mathcal{D}} f_{\mathbf{w}, a}(x)$  for some test distribution  $\mathcal{D}$  over  $\mathcal{X}$ ; here  $\mathcal{X}$  is the input space,  $\mathcal{W}$  is the space of model weights, and  $\mathcal{A}$  is the set of architectures. For generality, we do not require the training points to be drawn from  $\mathcal{D}$  to allow for domain adaptation, as is the case for one of our tasks, and we do not require the loss to be supervised. Note also that the goal here does not depend on the issue of computational or memory efficiency, which we do not focus on in our evaluations; there our restriction is only that the entire pipeline can be run on an NVIDIA V100 GPU.

Notably, this formulation makes no distinction between the model weights  $\mathbf{w}$  and architectures  $a$ , treating both as parameters of a larger model. Indeed, the goal of NAS may be seen as similar to model design, except now we include the design of an (often-discrete) *architecture space*  $\mathcal{A}$  such that it is easy to find an architecture  $a \in \mathcal{A}$  and model weights  $\mathbf{w} \in \mathcal{W}$  whose test loss  $\mathbb{E}_{\mathcal{D}} f_{\mathbf{w}, a}$  is low. This can be done in a one-shot manner—simultaneously optimizing  $a$  and  $\mathbf{w}$ —or using the standard approach of first finding an architecture  $a$  and then keeping it fixed while training model weights  $\mathbf{w}$  for it using a pre-specified algorithm such as tuned stochastic gradient descent (SGD).

This formulation also includes non-NAS methods by allowing the architecture search space to be a singleton. When the sole architecture is a standard and common network such as WRN [30], this yields a natural baseline method. On the other hand, when  $\mathcal{A}$  contains a single domain-specific architecture, such as a spherical convolutional neural network (CNN) [4], it yields the “human baseline” competitor approach. We make comparisons to both methods in our empirical results.

### 3.2 Motivation and Task Selection Methodology

Curating a diverse, practical set of tasks for the study of NAS is our primary motivation behind this work. We observe that past NAS benchmarks focused on the creation of larger search spaces and more sophisticated search methods for neural networks. However, the utility of these search spaces and methods are only evaluated on canonical computer vision datasets. Whether these new methods can improve upon non-NAS baselines remains an open question. This calls for the introduction of new datasets lest NAS research overfits to the biases of CIFAR-10 and ImageNet. By identifying these possible biases, future directions in NAS research can be better primed to suit the needs of practitioners, thereby incentivizing the deployment of NAS techniques on real applications.

NAS-Bench-360 comprises tasks from existing datasets and some variants of them that we’ve generated, summarized in Table 1. This work focuses exclusively on datasets with 2d input data because they are directly comparable to the classical vision datasets. During the selection of tasks, breadth is our main consideration. First, we formalize the categorization of tasks into **point** and **grid**, respectively referring to tasks with scalar outputs and 2d matrix outputs. In other words, point tasks are classification tasks, and grid tasks are regression tasks. The heavy bias of previous NAS research towards point tasks motivates the inclusion of grid tasks in our benchmark. Second, breadth is achieved by selecting tasks from various subjects and applications of deep learning, where introducing NAS could improve upon the performance of handcrafted neural networks.

### 3.3 List of Tasks from Diverse Data Sources

In lieu of providing raw data, we perform data pre-processing locally and store the processed data on a public Amazon Web Service’s S3 data bucket with download links available on our website. Our data treatment largely follows the procedure defined by the researchers who provided them. This would enhance the reproducibility of results by ensuring the uniformity of input data for different pipelines. Specific pre-processing and augmentation steps are described below.

#### 3.3.1 CIFAR-100: Standard Image Classification

As a starting point of comparison to existing benchmarks, we include the **CIFAR-100** task [14], which contains RGB images from natural settings to be classified into 100 fine-grained categories. CIFAR-100 is preferred over CIFAR-10 because it is more challenging and suffers less from over-fitting in previous research.

**Data pre-processing:** while the 10,000 testing images are kept aside only for evaluating architectures, the 50,000 training images are randomly partitioned into 40,000 for architecture search and 10,000 for validation. On all of the 50,000 training images, we apply standard CIFAR augmentations including random crops and horizontal flipping, and finally normalize them using a pre-calculated

Table 1: Information of tasks in NAS-Bench-360

| Task name  | Dataset size | Type  | Learning objective                                                                | New to NAS |
|------------|--------------|-------|-----------------------------------------------------------------------------------|------------|
| CIFAR-100  | 60K          | Point | Classify natural images into 100 classes                                          |            |
| Spherical  | 60K          | Point | Classify spherically projected images into 100 classes                            | ✓          |
| NinaPro    | 3956         | Point | Classify sEMG signals into 18 classes corresponding to hand gestures              | ✓          |
| Darcy Flow | 1100         | Grid  | Predict the final state of a fluid from its initial conditions according to a PDE | ✓          |
| PSICOV     | 3606         | Grid  | Predict pairwise distances between residuals from 2d protein sequence features    | ✓          |

mean and standard deviation of this set. On the 10,000 testing images, we only apply normalization with the same constants.

### 3.3.2 Spherical: Classifying Spherically Projected CIFAR-100 Images

To test NAS methods applied to natural-image-like data, we consider the task of classifying spherical projections of the CIFAR-100 images, which we call the **Spherical** task. In addition to scientific interest, spherical image data is also present in a variety of applications, such as omnidirectional vision in robotics and weather modeling in meteorology, as sensors usually produce distorted image signals in real-life settings. To create a spherical variant of CIFAR, we project the planar signals of the CIFAR images to the northern hemisphere and add a random rotation to produce spherical signals for each individual channel following the procedure specified in [4]. The resulting images are 60\*60 pixels with RGB channels.

**Data pre-processing:** with the same split ratios CIFAR-100, the generated spherical image data is directly used for training and evaluation without data augmentation and pre-processing.

### 3.3.3 NinaPro: Classifying Electromyography Signals

Our final classification task, **NinaPro**, moves away from the image domain to classify hand gestures indicated by electromyography signals. For this, we use a subset of the NinaPro DB5 dataset [2] in which two thalamic Myo armbands collect EMG signals from 10 test individuals who hold 18 different hand gestures to be classified. These armbands leverage data from muscle movement, which is collected using electrodes in the form of wave signals. Each wave signal is then sampled using a wavelength and frequency prescribed in [5] to produce 2d signals.

**Data pre-processing:** Containing less than 4,000 samples, the data is comprised of single-channel signals with an irregular shape of 16\*52 pixels. This task also differs from CIFAR for its class imbalance, as over 65% of all gestures are the neutral position. We split the data using the same ratio as CIFAR, resulting in 2638 samples for training, and 659 samples for validation and testing each. No additional pre-processing is performed.

### 3.3.4 Darcy Flow: Solving Partial Differential Equations

Our first regression task, **Darcy Flow**, focuses on learning a map from the initial conditions of a PDE to the solution at a later timestep. This application aims to replace traditional solvers with learned neural networks, which can output a result in a single forward pass. The input is a 2d grid specifying the initial conditions of a fluid and the output is a 2d grid specifying the fluid state at a later time, with the ground truth being the result computed by a traditional solver.

**Data pre-processing:** we use scripts provided by [19] to generate the PDEs and their solutions, for a total of 900 data points for training, 100 for validation, and 100 for testing. All input data is normalized with constants calculated on the training set before fed into the neural network and

de-normalized following an encode-decode scheme. The solutions, or labels, for the training set are also encoded and decoded this way. The test labels are not processed. We report the mean square error (MSE or  $\ell_2$ ).

### 3.3.5 PSICOV: Protein Distance Prediction

Our final task, **PSICOV**, studies the use of neural networks in the protein folding prediction pipeline, which has recently received significant attention to the success of methods like AlphaFold [12]. While the dataset and method they use are too large-scale for our purposes, we consider a smaller set of protein structures to tackle the specific problem of inter-residual distance predictions outlined in [1]. 2d large-scale features are extracted from protein sequences, resulting in input feature maps with a massive number of channels. Correspondingly, the labels are pairwise-distance matrices with the same spatial dimension.

**Data pre-processing:** we adopt the chosen subset of DeepCov proteins in [1], consisting of 3,456 proteins each with 128\*128 feature maps across 57 channels. 100 proteins from this set are used for validation and the rest for training. Test data for final evaluation is gathered from another set of 150 proteins, PSICOV. Since these produce feature maps that are larger (512\*512), we run the prediction network over all of its non-overlapping 128\*128 patches. The evaluation metric is mean absolute error (MAE or  $\ell_1$ ) computed on distances below 8 Å, referred to as MAE<sub>8</sub>.

### 3.4 Ethics and Responsible Use

Within our array of tasks, the only dataset containing human-derived data is NinaPro. Our chosen subset of NinaPro contains only muscle movement data from 10 healthy individuals, without any exposure of personal information from clinical data. The original experiments to acquire NinaPro data are approved by the ethics commission of the state of Valais, Switzerland [2]. For other datasets, we have listed the data licenses in the appendix for responsible usages of data. While we do not view the specific datasets we use in this benchmark as potential candidates for misuse, the broader goal of applying NAS to new domains comes with inherent risks that may require mitigation on an application-by-application basis.

## 4 Using NAS-Bench-360 to Study Architecture Search Methods

Having detailed our construction of NAS-Bench-360, we now demonstrate its usefulness on (a) comparing and evaluating state-of-the-art architecture search methods on powerful search spaces and (b) discovering new insights on their performance on under-explored domains. In this section, we first specify the different NAS algorithms and baselines we compare, followed by the experimental and reproducibility setup we follow. Finally, we report our main comparisons and analyze the results.

### 4.1 Baselines and Search Procedures

From the discussion in Section 3, the two non-NAS baseline methods we consider—applying a tuned WRN to all tasks and using a fixed, domain-specific architecture—can be viewed via the NAS setup as having a singleton architecture search space. As for NAS algorithms themselves, we focus on two well-known paradigms for search: cell-based NAS (using DARTS [20]) and macro NAS (using DenseNAS [9]). We detail these four approaches below.

**Wide ResNet with Hyperparameter Tuning** The residual network (ResNet) and its derivative architectures are canonical for classic computer vision, and we investigate their ability to generalize to our selection of tasks. A more powerful adaptation of ResNet, the Wide ResNet [30] is chosen as the backbone architecture. For automated training, we wrap the training procedure with a hyperparameter tuning algorithm, ASHA [15], an asynchronous version of Hyperband [18]. Given a range for each hyperparameter, either discrete or continuous, ASHA uniformly samples configurations and uses brackets of elimination: at each round, each configuration is trained for some epochs, before the algorithm selects the best-performing portion based on validation metrics. Since we use the Wide ResNet backbone for all tasks, our tuning budget is fixed and uniform.

**Expert-Designed Networks** We also include expert-driven design of architectures in specific domains as a more rigorous comparator for NAS methods on our tasks. Frequently this includes not only hand-designed topologies and operation patterns but custom neural operations themselves, which are often crucial for success on domains beyond computer vision. Below we briefly summarize the architectures chosen for each task.

- **CIFAR-100:** While this task is very heavily studied and one can achieve very high accuracies using optimization tricks and transfer from ImageNet, we restrict our selection to existing results that use only the simple (standard) data augmentation we allow for the evaluation phase. Here the best result found is using DenseNet-BC [10].
- **Spherical:** This task is often regarded as a canonical example where a specific neural operation, specifically spherical convolutions, are the “right” operation to substitute for the convolution due to data-specific properties. Our result is from a wide variation of the spherical CNN in [4], with a max width of 256 channels from 64.
- **NinaPro:** As the original paper studying NinaPro used fairly weak networks that achieve a much higher error, here we simply report the performance of our tuned WRN baseline.
- **Darcy Flow:** Here we report the performance of a four-layer network that replaces convolutions with Fourier Neural Operators (FNOs) [19], which were specially designed for the PDE task. Note that our reproduced result attains slightly better MSE than the numbers reported by the authors.
- **PSICOV:** We report the reproduced performance of the ResNet-256 network used by the PDNET, a deeper, narrow, and dilated version of the standard ResNet used for ImageNet; note our reproduction attains much better MAE<sub>8</sub> than the authors report [1].

**Cell-based Search Using DARTS** The first state-of-the-art NAS paradigm within our consideration is cell-based NAS. Cell-based methods first search for a genotype, which is a cell containing neural operations such as convolution and pooling. During evaluation, a neural network is constructed by replicating the searched cell and stacking them together. The most popular search space for this approach is the one used by the DARTS space [20], consisting of assigning one of eight operations to six edges in two types of cells: “normal” cells preserve the shape of the input representation while “reduction” cells downsample it. Note that for the grid tasks we do not use the reduction cell so as to not introduce a bottleneck.

Finally, to adhere to standard ML practices we do *not* adapt the standard DARTS pipeline, which uses test performance to select from multiple random seeds. This, in addition to not using other evaluation-time enhancements such—specifically auxiliary towers and the cutout data augmentation—leads to lower performance on CIFAR-100 than is reported in the literature. As this search space has been heavily studied since its introduction, we use as a search routine a recent approach—GAEA PC-DARTS—that achieves some of the best-known results on CIFAR-10 and ImageNet for this benchmark [16].

**Macro NAS Using DenseNAS** The second NAS paradigm we consider is macro NAS. Instead of building from a fixed cell, macro NAS requires the specification of a super network with different inter-connected network blocks. These blocks and connections are then pruned during the search phase to construct the output neural net for evaluation. For this benchmark, we also choose a recent search space in this NAS paradigm, DenseNAS [9], which similarly to the DARTS space has near state-of-the-art results on ImageNet.

DenseNAS searches for architectures with densely-connected, customizable routing blocks to emulate DenseNet [10]. In our experiments, we use the ResNet-based search space, DenseNAS-R1, with all of WRN’s neural operations for better comparison with the baseline backbone. For point tasks and grid tasks, we adapt two super networks from the one used for ImageNet as inputs to the search algorithm. The grid task super network maintains the same spatial dimensions without downsampling to avoid bottlenecks, and we use a lower learning rate for evaluating architectures on grid tasks to prevent divergence. Other training and evaluation procedures are identical to those in the original paper and uniform across all tasks.

Table 2: Comparing NAS methods with baseline and expert-designed methods on NAS-Bench-360. All automated results (WRN, DenseNAS, and GAEA PC-DARTS) are averages of three random seeds. See Appendix for standard deviations.

| Search space   | Search method | CIFAR-100<br>(0-1 err.) | Spherical<br>(0-1 err.) | NinaPro<br>(0-1 err.) | Darcy Flow<br>MSE | PSICOV<br>MAE <sub>s</sub> |
|----------------|---------------|-------------------------|-------------------------|-----------------------|-------------------|----------------------------|
| WRN baseline   | ASHA          | 24.89                   | 88.45                   | <b>6.88</b>           | 0.041             | 5.71                       |
| expert design* | hand-tuning   | <b>17.17</b>            | 64.42                   | <b>6.88</b>           | <b>0.0096</b>     | 3.50                       |
| DenseNAS-R1    | DenseNAS      | 27.44                   | 72.99                   | 10.17                 | 0.10              | 3.84                       |
| DARTS Cell     | GAEA PC-DARTS | 24.19                   | <b>52.90</b>            | 11.43                 | 0.056             | <b>2.80</b>                |

\* Chosen according to best-effort literature search and implementation; c.f. Section 4.1.

## 4.2 Experimental Setup

Our main experiments consist of 3 evaluation trials for every combination of method and task, fixing one random seed for each trial. We present these results in Table 2 and discuss the specific procedure, reproducibility, and extension experiments in the following subsections.

**Using validation data** For best practices in NAS, we argue for the separation of the final testing set and the validation set, which is specifically for selecting neural architectures and hyperparameters. After this process, we combine training and validation data to perform retraining and evaluation on the test set. This result is reported as final and is not used in any way to further optimize the model.

**Hyperparameter tuning** In experiments with hyperparameter tuning, we consistently use the same hyperparameter ranges and fix the tuning budget, in terms of the number of configurations and maximum training epochs, across all tasks. The tuning budget is selected to be 2.5 to 3 times the backbone training time. This is to eliminate inductive biases for specific tasks. Details on the tuning procedure are in the appendix.

**Software and hardware** We adopt the free, open-source software *Determined*<sup>1</sup> for experiment management, hyperparameter tuning, AWS cloud deployment with docker containers. All experiments are performed on a single p3.2xlarge instance with one Nvidia V100 GPU. The computation cost in GPU hours of individual experiments using this setup can be found in the appendix.

**Reproducibility** The following measures in our experimental pipeline are taken to ensure the reproducibility of our results:

1. We perform most data pre-processing steps beforehand and store the processed data in the cloud for download. A data splitting scheme, once randomly selected, is then fixed for all experiments on that task, i.e. the same training, validation, and testing sets fed into the dataloader are always the same.
2. Experimentation code is always executed in a fixed docker container using a pre-built docker image on Docker Hub. This guarantees a uniform execution environment and saves users from the manual labor of configuring dependencies.
3. Via the specification of a random seed, *Determined* controls several important sources of randomness during code execution, including hyperparameter sampling and training data shuffling.
4. During training, we always validate on the full validation set, not on a mini-batch, to avoid stochasticity in the results.

## 4.3 Comparing NAS Approaches Using NAS-Bench-360

**Generalization of NAS to other domains** Our experiments demonstrate that state-of-the-art NAS approaches in classic vision are unable to outperform human-designed neural networks on 3 out of 5

<sup>1</sup>GitHub repository: <https://github.com/determined-ai/determined>

An Apple in CIFAR-100 and Spherical CIFAR-100

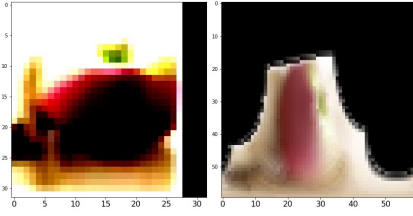

Figure 1: Comparison of the same CIFAR-100 image before and after the spherical transformation.

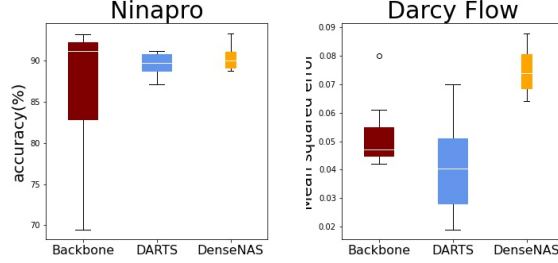

Figure 2: Distribution of random architectures and hyperparameters' performance on NinaPro and Darcy Flow.

Table 3: Experiment runtimes of NAS-Bench-360 (GPU hours)

| Task                | GAEA PC-DARTS | DenseNAS | WRN |
|---------------------|---------------|----------|-----|
| CIFAR-100           | 33            | 2        | 8   |
| Spherical CIFAR-100 | 39            | 2.5      | 8.5 |
| NinaPro             | 2             | 0.5      | 1   |
| Darcy Flow          | 15            | 0.5      | 2   |
| PSICOV              | 59.5          | 23       | 61  |

tasks in NAS-Bench-360. They do especially poorly on the Darcy Flow task and fall short of matching both non-NAS comparators by a large margin. Perhaps most surprisingly, neither the DARTS space nor DenseNAS, both very recent search spaces with strong results on ImageNet (and CIFAR-10 for the former) are able to outperform the reported performance of a fairly basic architecture (DenseNet) on CIFAR-100; this is especially interesting as DenseNAS was built around this architecture. Overall the results suggest that NAS is not yet fully generalizable to various applications of deep learning.

**Computational cost** In some time-sensitive applications of NAS, both efficiency and performance are criteria for NAS method selection. Our choice of methods exemplifies a tradeoff between these two factors. As a more computationally heavy method, GAEA PC-DARTS beats the more lightweight DenseNAS on most of the tasks except for NinaPro, where they achieve similar accuracies. On certain tasks, such as NinaPro and PSICOV, DenseNAS would be the more cost-effective option than GAEA PC-DARTS to have decent performance on par with handcrafted neural architectures. Note that the computation cost of the WRN baseline can vary due to randomness inherent in ASHA’s asynchrony. We report all experiment runtimes in Table 3.

**CIFAR-100 vs. Spherical** The Spherical task can be directly compared to CIFAR-100 to assess how well NAS methods could handle image distortions. With the same setup across tasks, both the DARTS space and DenseNAS have reasonably good numbers on CIFAR-100, but their results significantly deteriorate on the spherical variant. Both obtain much worse error when the images are spherically projected, but a much larger gap emerges between the two methods, with DenseNAS performing quite badly. On the other hand, the searched DARTS Cell not only performs 20-36% better than the other convolutional approaches but even beats our best-effort adaptation of the spherical CNN approach to this task [4], in which we expanded the size of that network. This is surprising because spherical convolutions were designed specifically for such data. We believe these results indicate that the spherical dataset may be a useful but simple way for distinguishing NAS approaches when they are overfitting to standard computer vision domains; Figure 1 provides an example of the distortion.

**WRN as a baseline** Viewing the WRN baseline as a singleton architecture search space, we compare this baseline to more sophisticated NAS search spaces. On our set of new tasks, NAS does



Table 4:  $\ell_1$  error of supernet and searched architectures (discretized) on grid tasks

| Task       | DARTS             |                   | DenseNAS          |                  |
|------------|-------------------|-------------------|-------------------|------------------|
|            | Supernet          | Discretized       | Supernet          | Discretized      |
| Darcy Flow | $0.031 \pm 0.001$ | $0.057 \pm 0.012$ | $0.041 \pm 0.002$ | $0.10 \pm 0.010$ |
| PSICOV     | $3.87 \pm 0.12$   | $2.80 \pm 0.057$  | $7.96 \pm 0.20$   | $3.84 \pm 0.15$  |

not perform better than Wide ResNet with hyperparameter tuning on CIFAR-100, NinaPro, and Darcy Flow but excels on the rest. Hyperparameter optimization can boost the backbone performance considerably to rival the performance of NAS methods. Most non-Bayesian hyperparameter tuning algorithms, such as random search [17], population-based training [11], and Hyperband [18], are also straightforward to apply with any neural network backbone. Therefore, we argue for the use of hyperparameter-tuned backbones to assess the effectiveness of NAS approaches and encourage their inclusion in NAS benchmarks.

#### 4.4 In-Depth Studies Using NAS-Bench-360

**Supernet performance on grid tasks** During architecture search, our NAS methods on the DARTS and DenseNAS search spaces train the supernets to find optimal neural operations on the validation set. Surprisingly, the validation error of the supernet is sometimes lower than that of the final searched, discretized neural network. Therefore, we evaluate the supernet of DARTS and DenseNAS on the testing set, and we compare its performance with that of the final neural network in Table 4. The supernet outperforms the final network on Darcy Flow for both methods, but the reverse is true for the PSICOV task and all point tasks. The supernet is not in the search space and so we report the discretized result; nevertheless, this fact suggests that performance on a task like Darcy Flow might benefit from a better search space.

**Evaluating random architectures and hyperparameters** The power of an architecture or hyperparameter space can also be characterized by the performance of its random elements. We assess both the average and variance of the results. To do this, we randomly sample 8 network architectures each from the search spaces of DARTS and DenseNAS, and we test their performance on the NinaPro and Darcy Flow tasks, one for classification and the other for regression. For comparison, we also randomly sample 8 hyperparameter configurations to train the backbone Wide-ResNet in Figure 2. While rather successful on NinaPro, the random architectures have a high average error and vary in performance on the PDE solving task. Random hyperparameters are more unstable on NinaPro, but its median performance is better than NAS.

**Utility of hyperparameter tuning** The final experiment examines whether hyperparameter tuning improves the performance of WRN on various tasks. During hyperparameter search, we compare the validation metrics of training using default hyperparameters and using tuned ones from ASHA to select final hyperparameters for retraining. Despite the small tuning budget allocated to ASHA, tuned hyperparameters could outperform the default setting on all tasks except for CIFAR-100. Our results suggest that wide ResNet’s standard set of hyperparameters are only optimized for conventional image classification. On other tasks, hyperparameter optimization is helpful for boosting performance.

## 5 Conclusion

**NAS-Bench-360** is a benchmarking suite with a novel, diverse set of tasks. The tasks are derived from various fields of academic research, leading to different potential applications. Our selection of NAS approaches achieves state-of-the-art performances on most tasks, which points to new possibilities of incorporating NAS into new research domains. All datasets and reproducible experiment code are open-sourced, and we welcome researchers to use these tasks and further iterate on them with new NAS methods. Finally, a possible extension to generalize this set of tasks is datasets with 1d or 3d inputs, such as audio. We hope our work can encourage the NAS community to move towards tackling more diverse problems in the real world.

## References

- [1] Badri Adhikari. A fully open-source framework for deep learning protein real-valued distances. *Scientific reports*, 10(1):1–10, 2020.
- [2] Manfredo Atzori, Arjan Gijsberts, Simone Heynen, Anne-Gabrielle Mittaz Hager, Olivier Deriaz, Patrick Van Der Smagt, Claudio Castellini, Barbara Caputo, and Henning Müller. Building the ninapro database: A resource for the biorobotics community. In *2012 4th IEEE RAS & EMBS International Conference on Biomedical Robotics and Biomechatronics (BioRob)*, pages 1258–1265. IEEE, 2012.
- [3] Han Cai, Ligeng Zhu, and Song Han. ProxylessNAS: Direct neural architecture search on target task and hardware. In *Proceedings of the 7th International Conference on Learning Representations*, 2019.
- [4] Taco S. Cohen, Mario Geiger, Jonas Koehler, and Max Welling. Spherical CNNs. In *Proceedings of the 6th International Conference on Learning Representations*, 2018.
- [5] Ulysse Côté-Allard, Cheikh Latyr Fall, Alexandre Drouin, Alexandre Campeau-Lecours, Clément Gosselin, Kyrre Glette, François Laviolette, and Benoit Gosselin. Deep learning for electromyographic hand gesture signal classification using transfer learning. *IEEE Transactions on Neural Systems and Rehabilitation Engineering*, 27(4):760–771, 2019.
- [6] Xuanyi Dong and Yi Yang. NAS-Bench-201: Extending the scope of reproducible neural architecture search. In *Proceedings of the 8th International Conference on Learning Representations*, 2020.
- [7] Yawen Duan, Xin Chen, Hang Xu, Zewei Chen, Xiaodan Liang, Tong Zhang, and Zhenguo Li. TransNAS-Bench-101: Improving transferability and generalizability of cross-task neural architecture search. In *Proceedings of the IEEE Conference on Computer Vision and Pattern Recognition*, 2021.
- [8] Thomas Elsken, Jan Hendrik Metzen, and Frank Hutter. Neural architecture search: A survey. *Journal of Machine Learning Research*, 20(55):1–21, 2019.
- [9] Jiemin Fang, Yuzhu Sun, Qian Zhang, Yuan Li, Wenyu Liu, and Xinggang Wang. Densely connected search space for more flexible neural architecture search. In *Proceedings of the IEEE Conference on Computer Vision and Pattern Recognition*, 2020.
- [10] Gao Huang, Zhuang Liu, Laurens Van Der Maaten, and Kilian Q Weinberger. Densely connected convolutional networks. In *Proceedings of the IEEE conference on computer vision and pattern recognition*, pages 4700–4708, 2017.
- [11] Max Jaderberg, Valentin Dalibard, Simon Osindero, Wojciech M Czarnecki, Jeff Donahue, Ali Razavi, Oriol Vinyals, Tim Green, Iain Dunning, Karen Simonyan, et al. Population based training of neural networks. *arXiv preprint arXiv:1711.09846*, 2017.
- [12] John Jumper, Richard Evans, Alexander Pritzel, Tim Green, Michael Figurnov, Kathryn Tunyasuvunakool, Olaf Ronneberger, Russ Bates, Augustin Židek, Alex Bridgland, Clemens Meyer, Simon A A Kohl, Anna Potapenko, Andrew J Ballard, Andrew Cowie, Bernardino Romera-Paredes, Stanislav Nikolov, Rishub Jain, Jonas Adler, Trevor Back, Stig Petersen, David Reiman, Martin Steinegger, Michalina Pacholska, David Silver, Oriol Vinyals, Andrew W Senior, Koray Kavukcuoglu, Pushmeet Kohli, and Demis Hassabis. High accuracy protein structure prediction using deep learning. In *Fourteenth Critical Assessment of Techniques for Protein Structure Prediction (Abstract Book)*, 2020.
- [13] Nikita Klyuchnikov, Ilya Trofimov, Ekaterina Artemova, Mikhail Salnikov, Maxim Fedorov, and Evgeny Burnaev. NAS-Bench-NLP: Neural architecture search benchmark for natural language processing. *arXiv*, 2020.
- [14] Alex Krizhevsky. Learning multiple layers of features from tiny images. Technical report, 2009.

- [15] Liam Li, Kevin Jamieson, Afshin Rostamizadeh, Ekaterina Gonina, Moritz Hardt, Benjamin Recht, and Ameet Talwalkar. A system for massively parallel hyperparameter tuning. *arXiv preprint arXiv:1810.05934*, 2018.
- [16] Liam Li, Mikhail Khodak, Maria-Florina Balcan, and Ameet Talwalkar. Geometry-aware gradient algorithms for neural architecture search. In *Proceedings of the 9th International Conference on Learning Representations*, 2021.
- [17] Liam Li and Ameet Talwalkar. Random search and reproducibility for neural architecture search. In *Proceedings of the Conference on Uncertainty in Artificial Intelligence*, 2019.
- [18] Lisha Li, Kevin G Jamieson, Giulia DeSalvo, Afshin Rostamizadeh, and Ameet Talwalkar. Hyperband: Bandit-based configuration evaluation for hyperparameter optimization. In *ICLR (Poster)*, 2017.
- [19] Zongyi Li, Nikola Borislavov Kovachki, Kamyar Azizzadenesheli, Burigede Liu, Kaushik Bhattacharya, Andrew Stuart, and Anima Anandkumar. Fourier neural operator for parametric partial differential equations. In *Proceedings of the 9th International Conference on Learning Representations*, 2021.
- [20] Hanxiao Liu, Karen Simonyan, and Yiming Yang. DARTS: Differentiable architecture search. In *Proceedings of the 7th International Conference on Learning Representations*, 2019.
- [21] Abhinav Mehrotra, Alberto Gil, C. P. Ramos, Sourav Bhattacharya, Łukasz Dudziak, Ravichander Vipera, Thomas Chau, Samin Ishtiaq, Mohamed S. Abdelfattah, and Nicholas D. Lane. NAS-Bench-ASR: Reproducible neural architecture search for speech recognition. In *Proceedings of the 8th International Conference on Learning Representations*, 2021.
- [22] Hieu Pham, Melody Y. Guan, Barret Zoph, Quoc V. Le, and Jeff Dean. Efficient neural architecture search via parameter sharing. In *Proceedings of the 35th International Conference on Machine Learning*, 2018.
- [23] Esteban Real, Chen Liang, David R. So, and Quoc V. Le. AutoML-Zero: Evolving machine learning algorithms from scratch. In *Proceedings of the 37th International Conference on Machine Learning*, 2020.
- [24] Nicholas Roberts, Mikhail Khodak, Tri Dao, Liam Li, Chris Ré, and Ameet Talwalkar. Rethinking neural operations for diverse tasks. *arXiv*, 2021.
- [25] Olga Russakovsky, Jia Deng, Hao Su, Jonathan Krause, Sanjeev Satheesh, Sean Ma, Zhiheng Huang, Andrej Karpathy, Aditya Khosla, Michael Bernstein, Alexander C. Berg, and Li Fei-Fei. ImageNet large scale visual recognition challenge. *International Journal of Computer Vision*, 115(3):211–252, 2015.
- [26] Eleni Triantafyllou, Tyler Zhu, Vincent Dumoulin, Pascal Lamblin, Utku Evci, Kelvin Xu, Ross Goroshin, Carles Gelada, Kevin Swersky, Pierre-Antoine Manzagol, and Hugo Larochelle. Meta-dataset: A dataset of datasets for learning to learn from few examples. In *Proceedings of the 8th International Conference on Learning Representations*, 2020.
- [27] Colin White, Willie Neiswanger, and Yash Savani. BANANAS: Bayesian optimization with neural architectures for neural architecture search. In *Proceedings of the 35th AAAI Conference on Artificial Intelligence*, 2021.
- [28] Yuhui Xu, Lingxi Xie, Xiaopeng Zhang, Xin Chen, Guo-Jun Qi, Qi Tian, and Hongkai Xiong. PC-DARTS: Partial channel connections for memory-efficient architecture search. In *Proceedings of the 8th International Conference on Learning Representations*, 2020.
- [29] Chris Ying, Aaron Klein, Eric Christiansen, Esteban Real, Kevin Murphy, and Frank Hutter. NAS-Bench-101: Towards reproducible neural architecture search. In *Proceedings of the 36th International Conference on Machine Learning*, 2019.
- [30] Sergey Zagoruyko and Nikos Komodakis. Wide residual networks. In *Proceedings of the British Machine Vision Conference*, 2016.

- 466 [31] Arber Zela, Julien Siems, and Frank Hutter. NAS-Bench-1Shot1: Benchmarking and dissecting  
 467 one-shot neural architecture search. In *Proceedings of the 8th International Conference on*  
 468 *Learning Representations*, 2020.
- 469 [32] Barret Zoph, Vijay Vasudevan, Jonathon Shlens, and Quoc V. Le. Learning transferable  
 470 architectures for scalable image recognition. In *Proceedings of the IEEE Conference on*  
 471 *Computer Vision and Pattern Recognition*, 2018.

## 472 Checklist

- 473 1. For all authors...
- 474 (a) Do the main claims made in the abstract and introduction accurately reflect the paper’s  
 475 contributions and scope? [Yes]
- 476 (b) Did you describe the limitations of your work? [Yes] . See conclusion (section 5).
- 477 (c) Did you discuss any potential negative societal impacts of your work? [Yes] , in section  
 478 3.4.
- 479 (d) Have you read the ethics review guidelines and ensured that your paper conforms to  
 480 them? [Yes]
- 481 2. If you are including theoretical results...
- 482 (a) Did you state the full set of assumptions of all theoretical results? [N/A]
- 483 (b) Did you include complete proofs of all theoretical results? [N/A]
- 484 3. If you ran experiments...
- 485 (a) Did you include the code, data, and instructions needed to reproduce the main experi-  
 486 mental results (either in the supplemental material or as a URL)? [Yes] . Instructions  
 487 are described in the paper; code and data are available on our dedicated website.
- 488 (b) Did you specify all the training details (e.g., data splits, hyperparameters, how they  
 489 were chosen)? [Yes] , in both section 3 and appendix section A.
- 490 (c) Did you report error bars (e.g., with respect to the random seed after running experi-  
 491 ments multiple times)? [Yes] , in the main results table and the appendix table.
- 492 (d) Did you include the total amount of compute and the type of resources used (e.g., type  
 493 of GPUs, internal cluster, or cloud provider)? [Yes] , in section 4.2.
- 494 4. If you are using existing assets (e.g., code, data, models) or curating/releasing new assets...
- 495 (a) If your work uses existing assets, did you cite the creators? [Yes]
- 496 (b) Did you mention the license of the assets? [Yes] , in appendix section B.
- 497 (c) Did you include any new assets either in the supplemental material or as a URL? [Yes]  
 498 . New assets are on our website.
- 499 (d) Did you discuss whether and how consent was obtained from people whose data you’re  
 500 using/curating? [N/A]
- 501 (e) Did you discuss whether the data you are using/curating contains personally identifiable  
 502 information or offensive content? [Yes] , in section 3.4.
- 503 5. If you used crowdsourcing or conducted research with human subjects...
- 504 (a) Did you include the full text of instructions given to participants and screenshots, if  
 505 applicable? [N/A]
- 506 (b) Did you describe any potential participant risks, with links to Institutional Review  
 507 Board (IRB) approvals, if applicable? [N/A]
- 508 (c) Did you include the estimated hourly wage paid to participants and the total amount  
 509 spent on participant compensation? [N/A]

Table 5: Results with standard deviations

| Search space | CIFAR-100<br>(0-1 loss) | Spherical<br>(0-1 loss) | NinaPro<br>(0-1 loss) | Darcy Flow<br>MSE  | PSICOV<br>MAE <sub>8</sub> |
|--------------|-------------------------|-------------------------|-----------------------|--------------------|----------------------------|
| WRN baseline | 24.89 $\pm$ 0.23        | 88.45 $\pm$ 0.60        | 6.88 $\pm$ 0.40       | 0.041 $\pm$ 0.0012 | 5.71 $\pm$ 0.15            |
| DenseNAS-R1  | 27.44 $\pm$ 0.65        | 72.99 $\pm$ 0.95        | 10.17 $\pm$ 1.31      | 0.10 $\pm$ 0.010   | 3.84 $\pm$ 0.15            |
| DARTS Cell   | 24.19 $\pm$ 2.12        | 52.90 $\pm$ 4.08        | 11.43 $\pm$ 0.61      | 0.056 $\pm$ 0.012  | 2.80 $\pm$ 0.057           |

## A Experiment Details

### A.1 Hyperparameter Tuning and Backbone

We use a wide residual network with 16 layers and a widening factor of 4 (WRN-16-4) for point tasks, and a network with 10 layers and widening factor of 4 (WRN-10-4) for grid tasks.

For tuning hyperparameters, we use ASHA’s default elimination schedule and search over 16 randomly sampled hyperparameter configurations. The maximum epochs that a single configuration could be trained is equal to that of Wide ResNet’s default, 200.

We have selected the following hyperparameter ranges for tuning the Wide ResNet backbone:

- $\log_{10}(\text{learning rate})$ : Unif $[-4, 0]$
- momentum: Unif $\{0.0, 0.9\}$
- $\log_{10}(\text{weight decay})$ : Unif $[-5, -1]$
- dropout: Unif $\{0.0, 0.3\}$
- batch size: 128 (all point tasks), 4 (Darcy Flow), 8 (PSICOV)

### A.2 Standard Deviations for Main Results

See Table 5.

### A.3 Reference Runtimes

Using a Nvidia V100 GPU, we have recorded the following runtimes for each experiment in this benchmark in Table 3. Overall, GAEA PC-DARTS is more costly than backbone with hyperparameter optimization, which is more costly than DenseNAS. The protein tasks requires heavy computation since the data is not static but generated during training.

### A.4 Adjustments for Grid Tasks

On the wide ResNet backbone, we add an adaptive averaging pooling operation to upsample the features back to their original dimensions before output. On the DARTS space, we prevent downsampling and keep spatial dimensions unchanged by disabling reduction cells and replacing them with normal cells. On DenseNAS, we configure the super-network to contain only blocks with the original spatial dimensions.

### A.5 Random Seeds

For main experiments, we fix the random seed to be 0,1,2 for each of the 3 trials respectively.

## B Supplementary Materials

### B.1 Code and Datasets

Our code is available on GitHub: <https://github.com/rtu715/NAS-Bench-360>  
The datasets, along with their documentation, metadata, etc., can be viewed and downloaded on GitHub pages: <https://rtu715.github.io/NAS-Bench-360/>

## 543 **B.2 Data License**

- 544 • CIFAR-100: CC BY 4.0 (on <https://www.tensorflow.org/datasets/catalog/cifar100>)
- 545
- 546 • Spherical CIFAR-100: CC BY-SA
- 547 • NinaPro: CC BY-ND
- 548 • Darcy Flow: MIT
- 549 • DeepCov, PSICOV: GPL
