# Supplementary material
Source: ML conference proceedings conference paper supplement (https://openreview.net/forum?id=cbFfF4g9fIy)
Supplement: supplementary_material [file attachment]

# Hosting, Maintenance and Licensing For NAS-Bench-360

## Hosting

- Hosting platform for datasets: **AWS S3**; hosting platform for code: **GitHub**
- AWS data bucket name: **pde-xd**; Github url: <https://github.com/rtu715/NAS-Bench-360>
- Dedicated website url: <https://rtu715.github.io/NAS-Bench-360/>

We have already uploaded all datasets and relevant code to the aforementioned platforms. For users, access to data is not directly through the AWS interface but through our hosted GitHub page, where all the download links are available. In addition, executing our provided code automatically pulls the data from S3 to a local directory.

## Maintenance and Long-Term Preservation

We believe that these platforms are long-lasting, and would maintain service indefinitely. There is no cost from using GitHub. Since our hosted datasets have a relatively small size, less than 10 GB in total, the cost incurred by AWS S3 storage is also minimal. We have sufficient funding from Carnegie Mellon University to ensure the maintenance of these datasets and code.

## Licensing

We have chosen the [CC BY-SA](https://creativecommons.org/licenses/by-sa/4.0/) license for our generated dataset, Spherical CIFAR-100.
