# Supplementary material
Source: ML conference proceedings conference paper supplement (https://openreview.net/forum?id=cbFfF4g9fIy)
Supplement: supplementary_material [file attachment]

## Data Nutrition Label - Spherical CIFAR-100

| Metadata    |                                                                                                                                                                                                                                                                                                                                                                                              |
|-------------|----------------------------------------------------------------------------------------------------------------------------------------------------------------------------------------------------------------------------------------------------------------------------------------------------------------------------------------------------------------------------------------------|
| Filename    | s2_cifar100.gz                                                                                                                                                                                                                                                                                                                                                                               |
| Format      | .gz                                                                                                                                                                                                                                                                                                                                                                                          |
| Url         | <a href="https://pde-xd.s3.amazonaws.com/spherical/s2_cifar100.gz">https://pde-xd.s3.amazonaws.com/spherical/s2_cifar100.gz</a>                                                                                                                                                                                                                                                              |
| Domain      | spherical/omnidirectional computer vision                                                                                                                                                                                                                                                                                                                                                    |
| Keywords    | tiny colored images, spherical vision, non-planar images, projection                                                                                                                                                                                                                                                                                                                         |
| Type        | matrix/array                                                                                                                                                                                                                                                                                                                                                                                 |
| Number      | 60,000 images                                                                                                                                                                                                                                                                                                                                                                                |
| Dimensions  | 3*60*60                                                                                                                                                                                                                                                                                                                                                                                      |
| Missing     | n/a                                                                                                                                                                                                                                                                                                                                                                                          |
| License     | CC BY-SA                                                                                                                                                                                                                                                                                                                                                                                     |
| Released    | 2021                                                                                                                                                                                                                                                                                                                                                                                         |
| Range       | n/a                                                                                                                                                                                                                                                                                                                                                                                          |
| Description | It has 100 classes containing 600 images each. There are 500 training images and 100 testing images per class. The data generation code is based on <a href="https://github.com/jonas-koehler/s2cnn/blob/master/examples/mnist/gendata.py">https://github.com/jonas-koehler/s2cnn/blob/master/examples/mnist/gendata.py</a> , and it is modified to project signals from all three channels. |
